# Supplementary material
Source: PubMed Central journal article supplement (PMC5518991)
Supplement: cr201779x1.pdf [file cr201779x1.pdf]

## Supplementary information, Figure S1

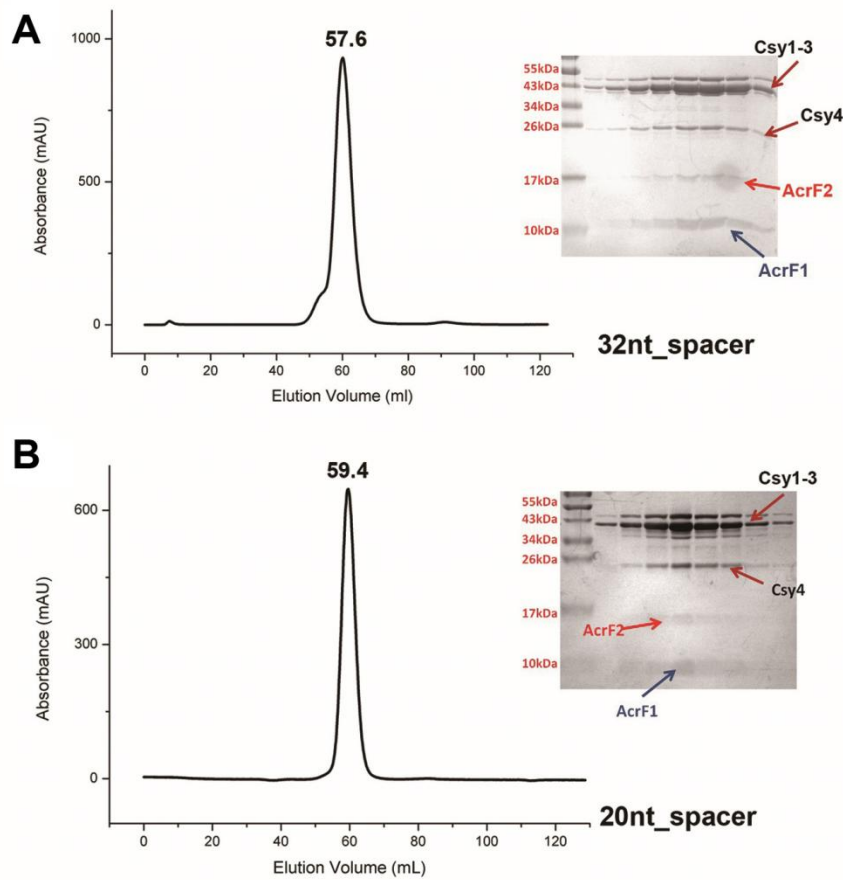

**Figure S1** Size exclusion chromatogram and SDS-PAGE profiles of **AcrF1/2-Csy32nt complex** and **AcrF1/2-Csy20nt complex**. The samples were analyzed by a Superdex 200 10/600 pg size-exclusion column and eluted fractions were analyzed by SDS-PAGE. The elution volume of each sample is labeled aside the peak and all protein component bands are indicated accordingly in the SDS-PAGE photos. **(A)** and **(B)** represent the complex with 32nt and 20nt spacers, respectively.
