# Supplementary material
Source: PubMed Central journal article supplement (PMC5518991)
Supplement: cr201779x3.pdf [file cr201779x3.pdf]

## Supplementary information, Figure S3

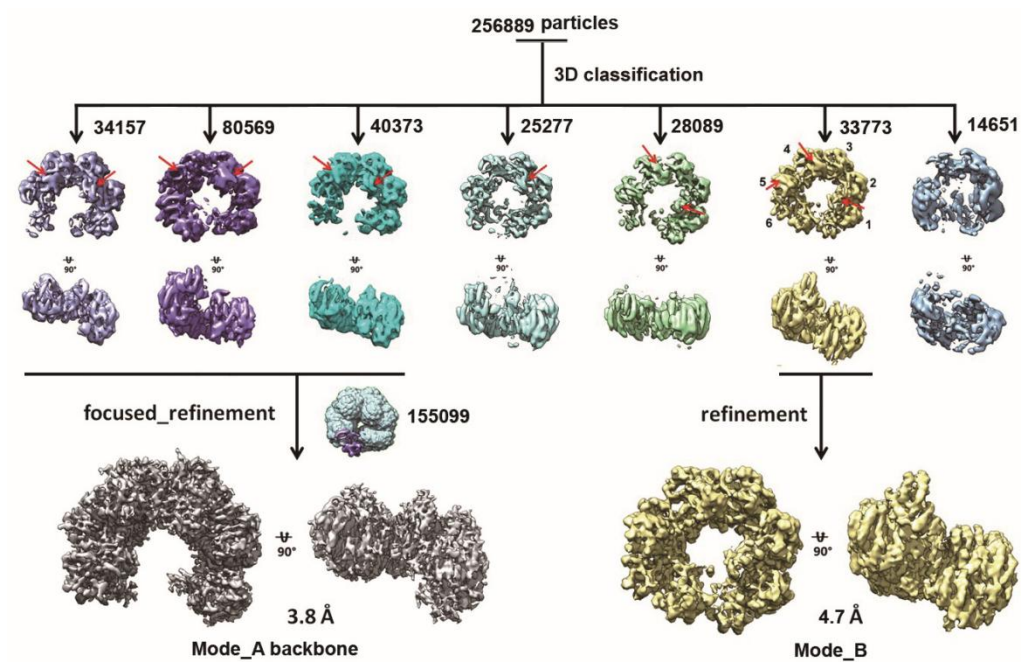

**Figure S3 Major image processing workflow of AcrF1/2-Csy32nt complex.** The 3D classification output models are shown at the same orientation with AcrF1 density feature highlighted by red arrows. The particle numbers of each class are labeled aside corresponding models.
