# Supplementary material
Source: PubMed Central journal article supplement (PMC5518991)
Supplement: cr201779x4.pdf [file cr201779x4.pdf]

## Supplementary information, Figure S4

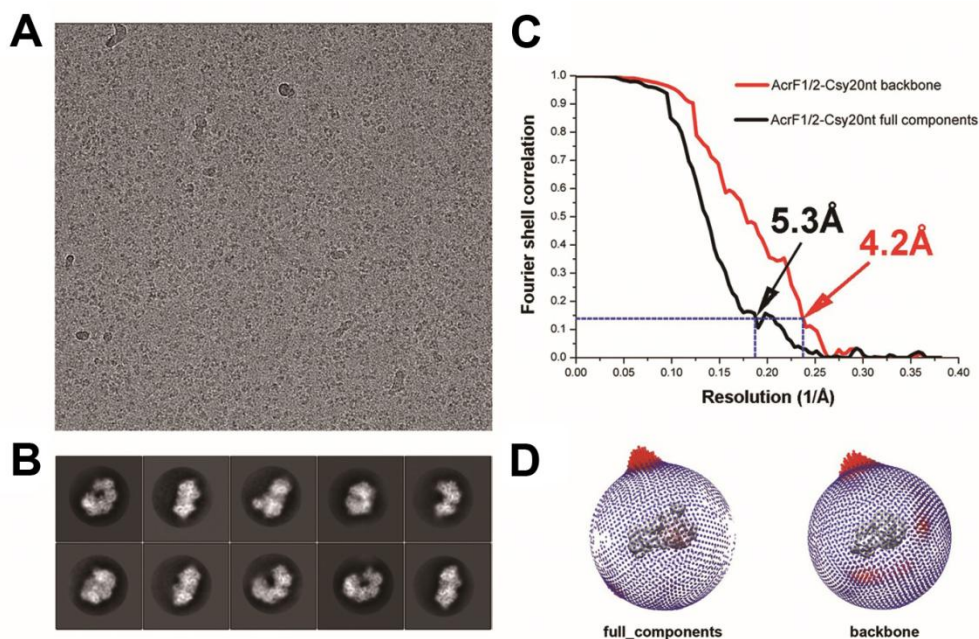

**Figure S4 Cryo-EM analysis of AcrF1/2-Csy20nt complex.** Representative electron micrograph (defocus -2.6  $\mu\text{m}$ ) (A) and 2D class average images (B) of AcrF1/2-Csy20nt complex. The Fourier shell correlation (FSC) curves (C) and angular distribution (D) of the two reconstructions from this dataset, backbone and full component class, which were determined at 4.2  $\text{\AA}$  and 5.3  $\text{\AA}$  resolutions, respectively. The 0.143 cut-off value is indicated by blue horizontal dash lines.
