# Supplementary material
Source: PubMed Central journal article supplement (PMC5518991)
Supplement: cr201779x5.pdf [file cr201779x5.pdf]

## Supplementary information, Figure S5

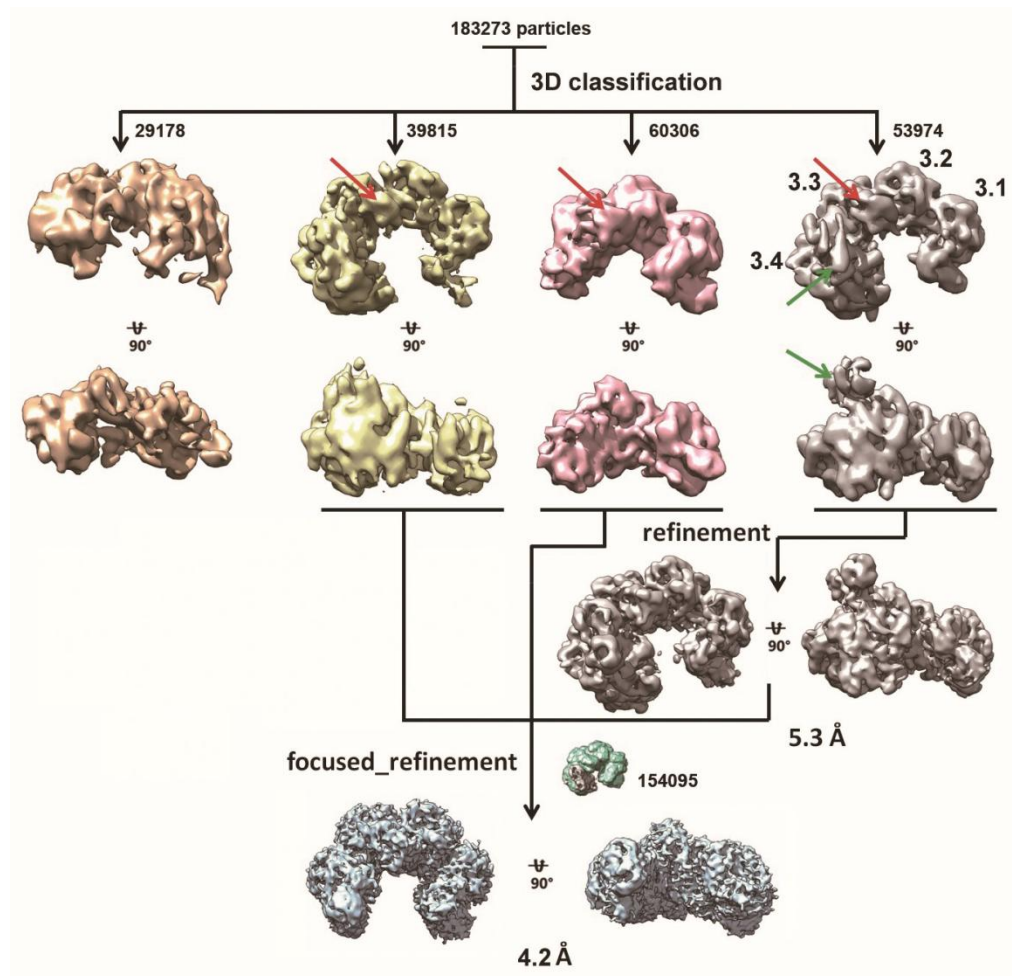

**Figure S5 Major image processing workflow of AcrF1/2-Csy20nt complex.** The 3D classification output models are shown at the same orientation with AcrF1 and AcrF2 density features highlighted by red and green arrows, respectively. The particle numbers of each class are labeled aside corresponding models.
