# Supplementary material
Source: PubMed Central journal article supplement (PMC5518991)
Supplement: cr201779x6.pdf [file cr201779x6.pdf]

## Supplementary information, Figure S6

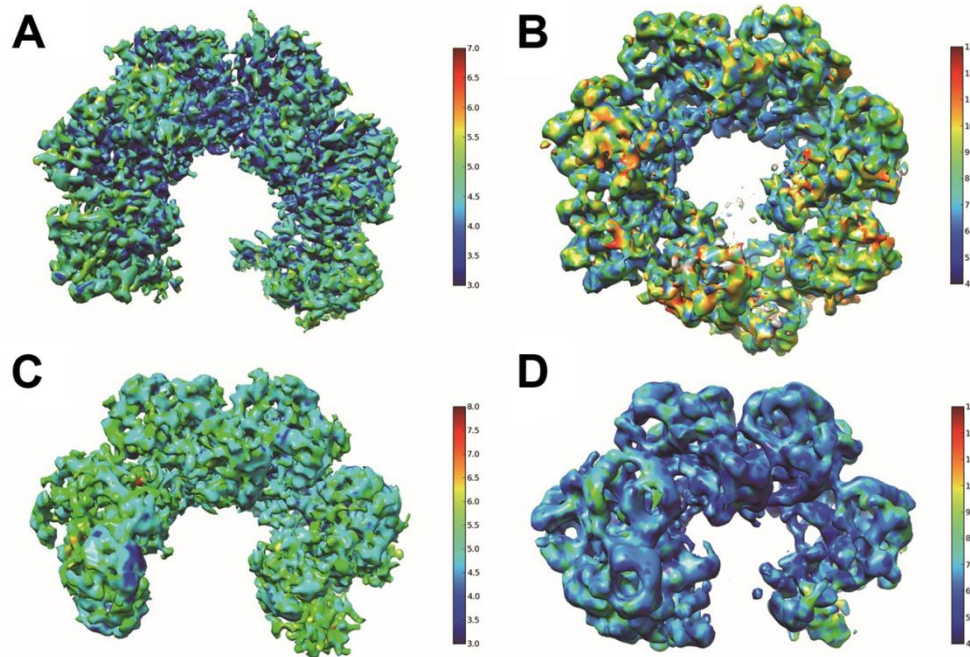

**Figure S6 Local resolution distribution patterns of the four reconstructions used in structural analysis.** The focused-refined AcrF1/2-Csy32nt complex backbone at binding mode A (**A**), the AcrF1-Csy32nt complex at binding mode B (**B**), the focused-refined AcrF1/2-Csy20nt complex backbone (**C**) and the full component AcrF1/2-Csy20nt complex (**D**) are evaluated individually to show their local resolution distribution patterns. The corresponding resolution scale bars are placed aside each map.
