# Supplementary material
Source: PubMed Central journal article supplement (PMC5518991)
Supplement: cr201779x7.pdf [file cr201779x7.pdf]

## Supplementary information, Figure S7

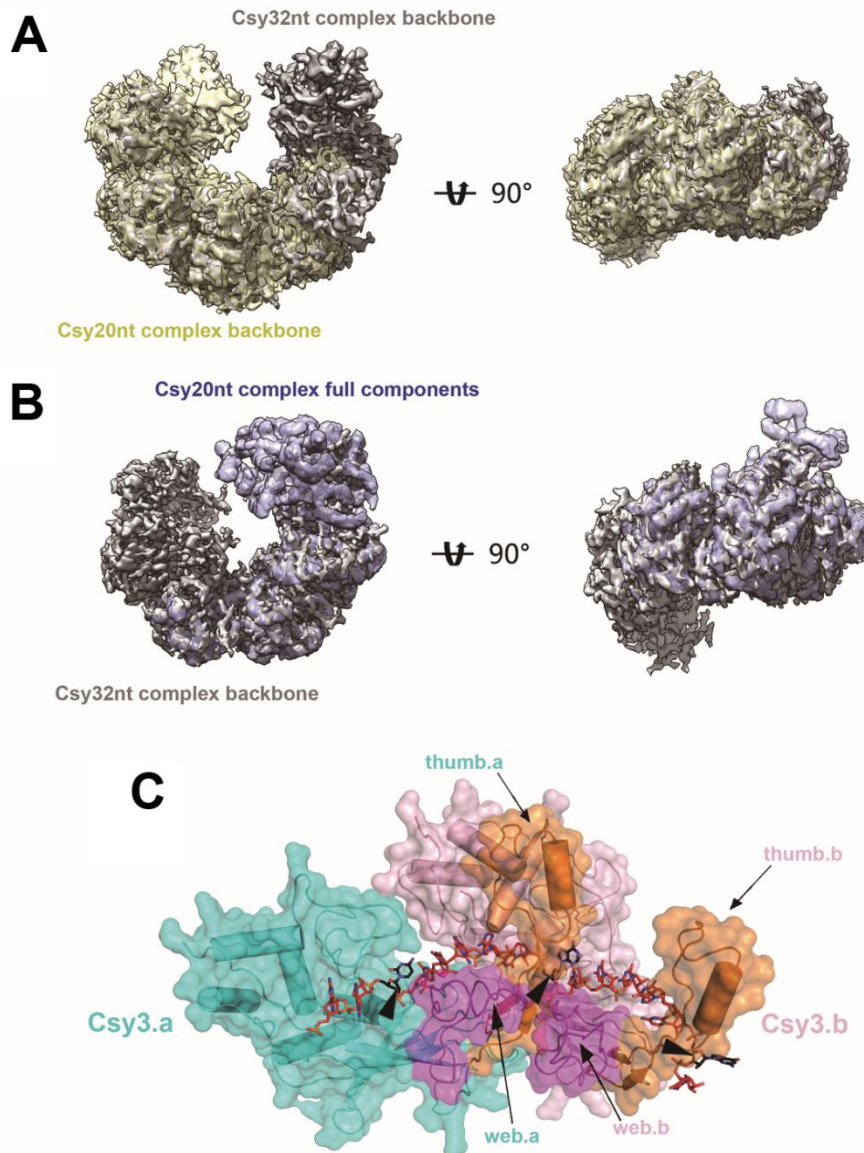

**Figure S7 Superposition of Csy3 backbone densities of AcrF1/2-Csy complex reconstructions and the self-assembly of Csy3 subunits. (A)** Superimposing the 32nt spacer complex backbone with the 20nt spacer backbone reconstructions. **(B)** Superimposing the 32nt spacer backbone with the 20nt spacer full component reconstructions. Different reconstructed maps are colored by models and labeled accordingly. **(C)** The self-assembly and crRNA binding mode of Csy3 subunits. The key domains involved are highlighted with different colors, web domains in magenta and thumb domains in orange. The encapsidated crRNA segment is shown as sticks and kink nucleotides are colored in black and indicated by black triangles.
