# Supplementary material
Source: PubMed Central journal article supplement (PMC5518991)
Supplement: cr201779x8.pdf [file cr201779x8.pdf]

## Supplementary information, Figure S8

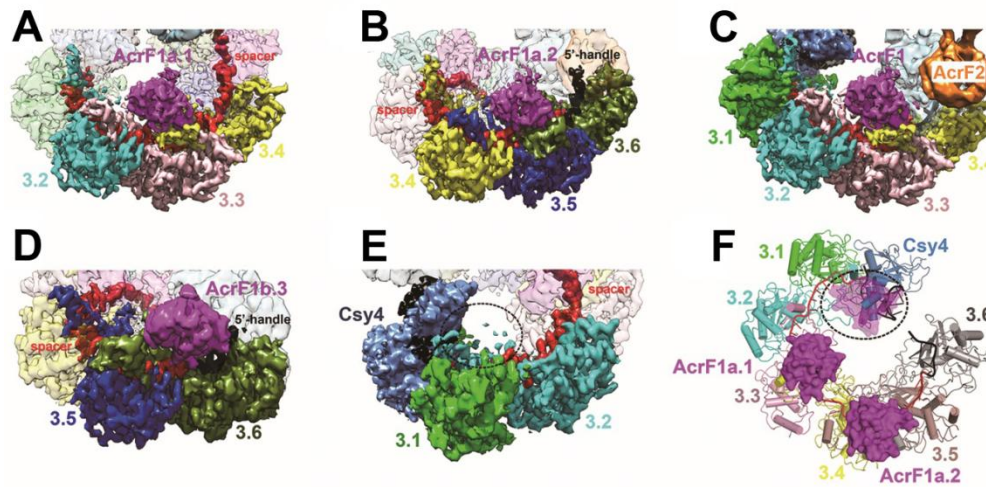

**Figure S8 Close up views of AcrF1 binding interfaces at different binding modes.**

(A-B) The binding interfaces of two copies of AcrF1 (AcrF1a.1 and AcrF1a.2) in binding mode A. Each subunit is colored by a unique color. The related interacting Csy3 subunits are highlighted with close up views and the non-interacting subunits are set as transparent. (C) The AcrF1 binding interface in AcrF1/2-Csy20nt complex. Each subunit is presented by different colors and labeled aside correspondingly. (D) The AcrF1b.3 binding interface in binding mode B. (E-F) The free AcrF1 binding site at Csy3.(1-2) interface. The supposed AcrF1 binding position is indicated by a black dash line ellipsoid to show the spatial clash with Csy4 head. The AcrF1 is modeled into the complex (F), shown as both cartoon and surface models and set as transparent to highlight the steric hindrance of Csy4 head.
