# Supplementary material
Source: PubMed Central journal article supplement (PMC5518991)
Supplement: cr201779x9.pdf [file cr201779x9.pdf]

## Supplementary information, Table S1

**Table S1** Statistics of the structural models of Csy3-crRNA32nt-AcrF1 and Csy3-crRNA20nt-AcrF1 sub-complexes refined against the 3.8 Å and 4.2 Å resolution cryo-EM maps.

| Model statistics            | <b>Csy3-crRNA32nt-AcrF1</b> | <b>Csy3-crRNA20nt-AcrF1</b> |
|-----------------------------|-----------------------------|-----------------------------|
| FSCoverage                  | 0.6618                      | 0.7907                      |
| R.m.s. deviations           |                             |                             |
| Bond length (Å)             | 0.0098                      | 0.0098                      |
| Bond angles (°)             | 2.11                        | 2.11                        |
| Ramachandran statistics (%) |                             |                             |
| Favored regions             | 63.49                       | 62.39                       |
| Allowed regions             | 33.74                       | 34.54                       |
| Outlier regions             | 2.77                        | 3.07                        |
| Rotamer outlier (%)         | 0.39                        | 0.41                        |
| Clash score                 | 14                          | 22.34                       |
| Molprobit score             | 2.55                        | 2.74                        |
